# Supplementary material for: Circular RNA CSNK1G1 promotes the progression of osteoarthritis by targeting the miR-4428/FUT2 axis
Source: PubMed Central journal article supplement — Int J Mol Med. 2020 Oct 27;47(1):232–42. doi: 10.3892/ijmm.2020.4772 (PMC7723508; doi:10.3892/ijmm.2020.4772), 2020-10-27

Figure S1. Results of transfection efficiency of si-circCSNK1G1. \*\*P<0.01.

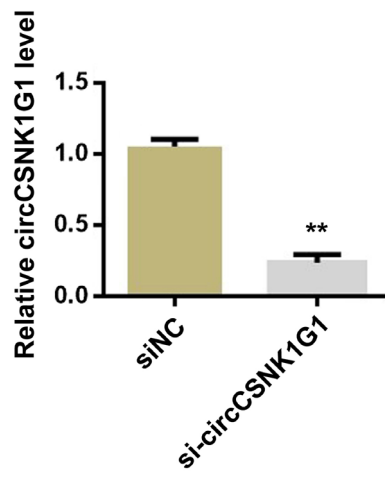

Figure S2. Results of transfection efficiency of AMO-4428.  
\*\*P<0.01.

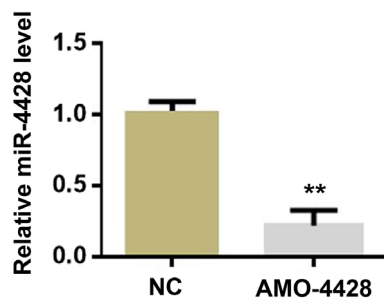

Figure S3. Results of transfection efficiency of miR-4428 mimics. \*\*P<0.01.

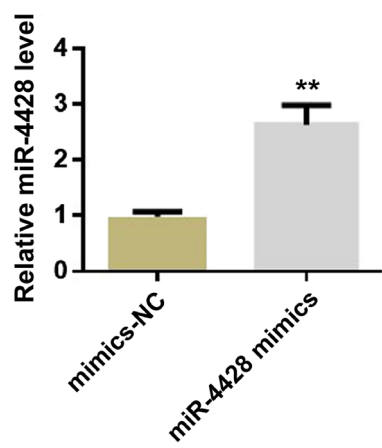

Supplement: Supplementary_Data.pdf [file Supplementary_Data.pdf]
